# Supplementary material for: Unexpected surface superparamagnetism in antiferromagnetic Cr2O3 nanoparticles
Source: Royal Society of Chemistry journal article supplement (doi:10.1039/c5ra04009d), 2015-01-01
Supplement: c5ra04009d1.pdf [file c5ra04009d1.pdf]

# Supporting Information

## Unexpected Surface Superparamagnetism in Antiferromagnetic $\text{Cr}_2\text{O}_3$ Nanoparticles

Zhaolong Yang,<sup>a</sup> Jing Zhang,<sup>a</sup> Daqiang Gao,<sup>a</sup> Zhonghua Zhu,<sup>b</sup> Guijin Yang,<sup>c</sup> and  
Desheng Xue<sup>\*a</sup>

<sup>a</sup> Key Laboratory for Magnetism and Magnetic Materials of MOE, Lanzhou  
University, Lanzhou 730000, P. R. China.

<sup>b</sup> Hunan University of Science and Technology, Xiangtan 411201, P. R. China.

<sup>c</sup> College of Physics and Electronic Engineering, Northwest Normal University,  
Lanzhou 730070, P. R. China.

\* To whom correspondence should be addressed.

E-mail: [xueds@lzu.edu.cn](mailto:xueds@lzu.edu.cn)

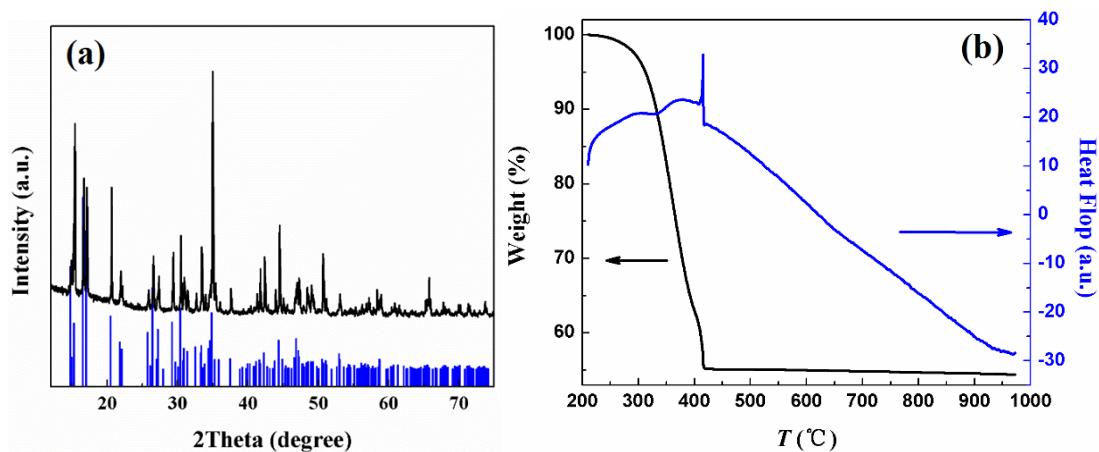

**Fig. S1** (a) XRD pattern of  $\text{CrCl}_3 \cdot 6\text{H}_2\text{O}$  precursor (JCPDS No. 71-2121). (b) TG-DTA curves of  $\text{CrCl}_3 \cdot 6\text{H}_2\text{O}$  precursor which were performed in the air under a heating rate of  $10^\circ\text{C}/\text{min}$ .

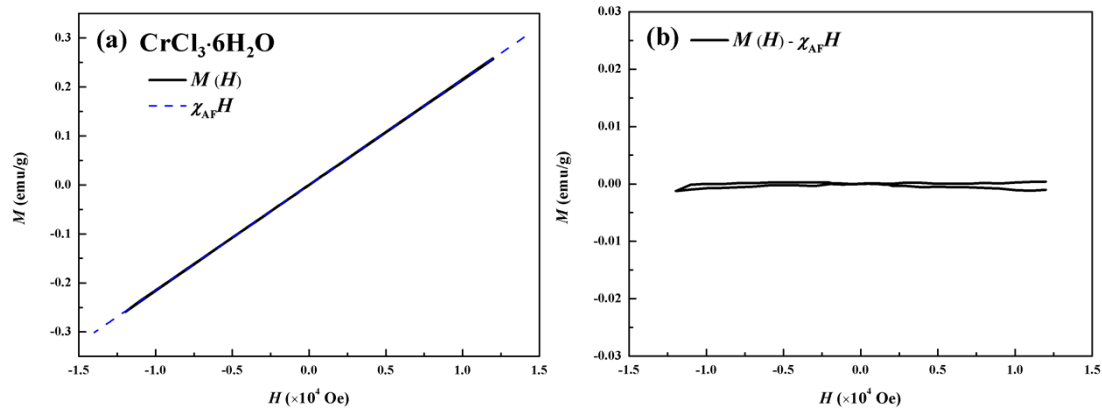

**Fig. S2** (a)  $M$ - $H$  curve of  $\text{CrCl}_3 \cdot 6\text{H}_2\text{O}$  precursor and the fitted AF signal ( $\chi_{\text{AF}} * H$ ). (b) The signal after subtracting AF contribution from the raw  $M$ - $H$  curve.

For clarity, the raw signals and AF magnetization ( $\chi_{AF} * H$ ) are shown in Fig. S3. The SPM signals were described by the equation  $M(H) = M_{SPM}(H) + \chi_{AF} * H$ .<sup>1,2</sup> The AF susceptibility ( $\chi_{AF}$ ) was obtained by linear fitting the  $M(H)$  curve in high field. However, in our sample, the  $\chi_{AF}$  increases obviously in high field ( $> 2$  T), which is attributed to the occurrence of SF and the moments in AF core reverse from parallel to perpendicular to the applied field. In that case, the  $\chi_{AF}$  cannot be approximated as a constant. So we fitted the slope using the data before SF transition ( $< 2$  T) and after the saturation of S-shape SPM signal ( $> 0.5$  T).

The nonlinear  $M(H)$  curves originate from two reasons: 1. S-shape SPM signal in lower field is attributed to the presence of  $Cr^{4+}$  in particle surface, and this could exist above  $T_N$  of  $Cr_2O_3$ ; 2. another nonlinear signal in higher field ( $> 2$  T) is due to the SF transition of AF core and only present below  $T_N$ .

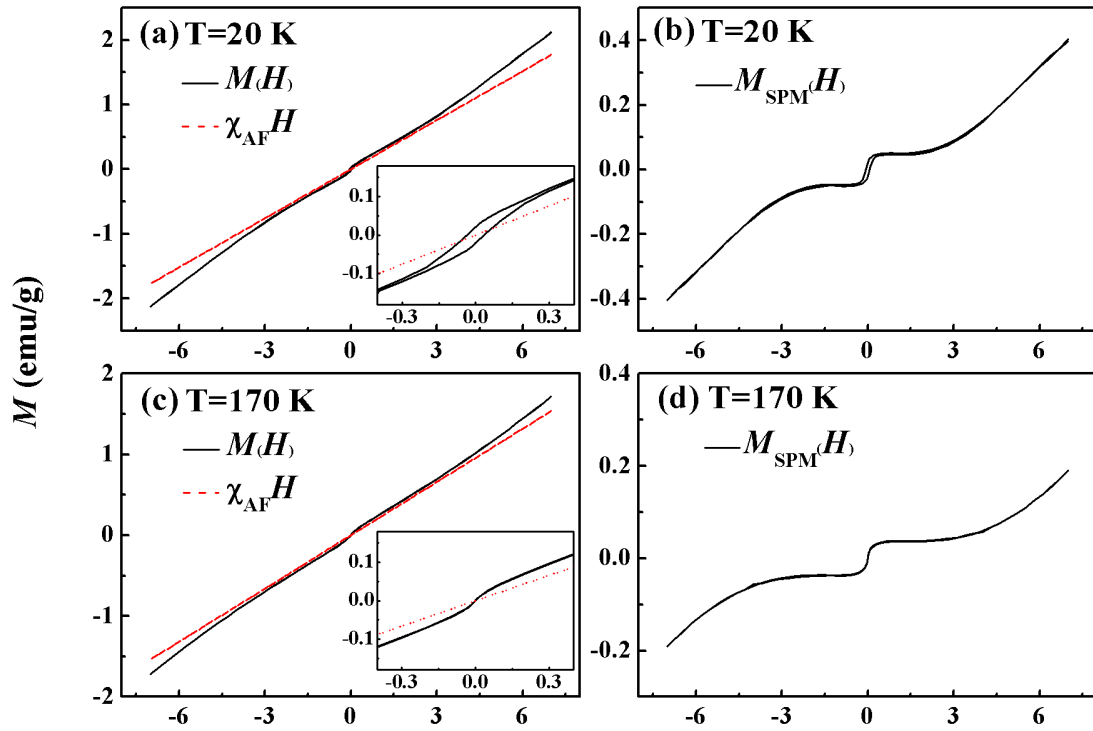

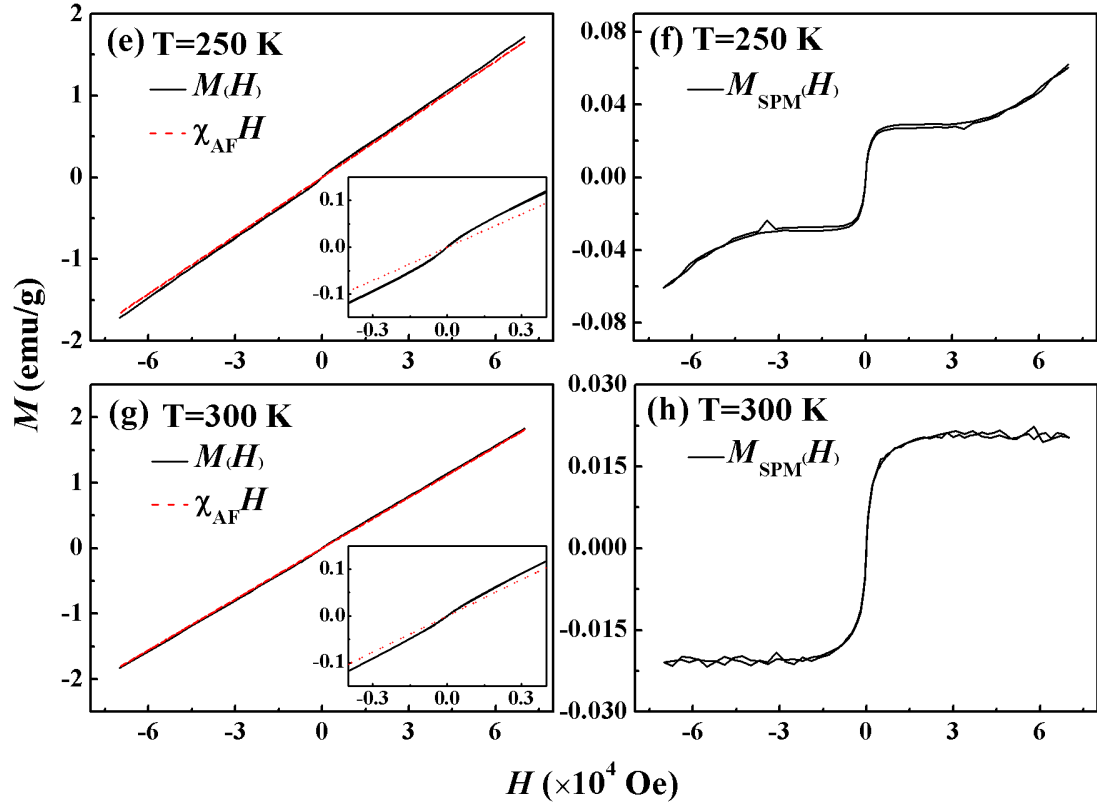

**Fig. S3**  $M$ - $H$  curves of  $\text{Cr}_2\text{O}_3$  nanoparticles and the fitted AF signals ( $\chi_{\text{AF}}*H$ ) at (a) 20 K, (c) 170 K, (e) 250 K, and (g) 300 K. The insets show the  $M$ - $H$  curves in lower field. The SPM and SF signals after subtracting AF contributions from the  $M$ - $H$  curves are shown in (b) 20 K, (d) 170 K, (f) 250 K, and (h) 300 K.

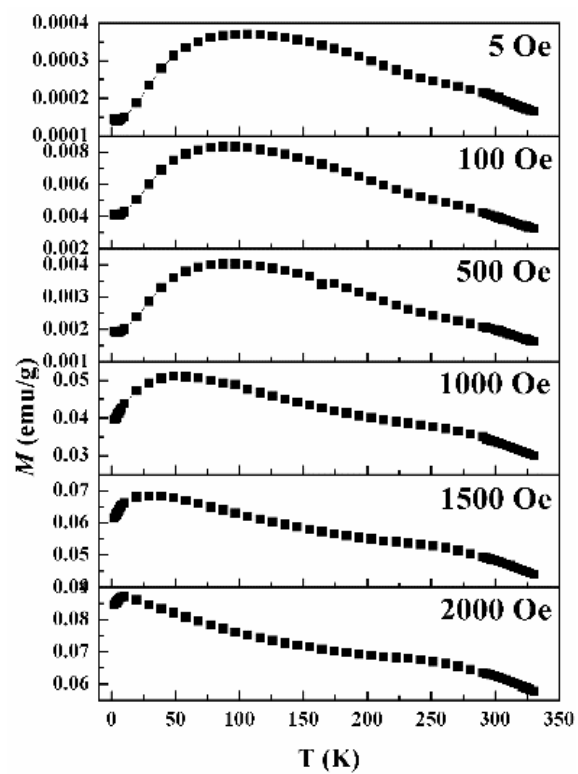

**Fig. S4** Field dependence of ZFC curves measured from 2 to 330 K at 5, 100, 500, 1000, 1500, and 2000 Oe.

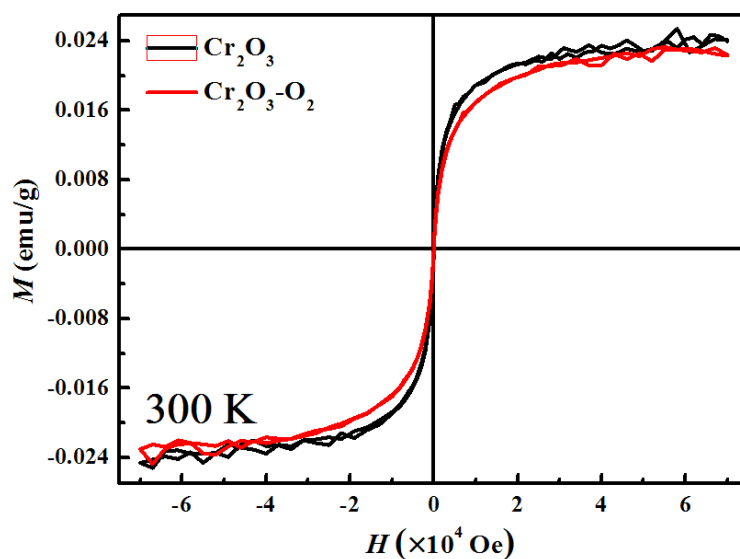

**Fig. S5**  $M$ - $H$  curves of  $\text{Cr}_2\text{O}_3$  (black line) and  $\text{Cr}_2\text{O}_3\text{-O}_2$  (red line) nanoparticles measured at 300 K (after subtracting AF signals)

1. S. A. Makhlof, H. Al-Attar and R. H. Kodama, *Solid State Commun.*, 2008, **145**, 1-4.
2. S. Mandal, S. Banerjee and K. S. R. Menon, *Phys. Rev. B*, 2009, **80**, 214420.
